# Supplementary material
Source: Springer Nature journal article supplement (https://www.springermedizin.de/resource/supplementary/13063_2006_184_MOESM9_ESM.pdf/9622246)

Cumulative Incidence Probability

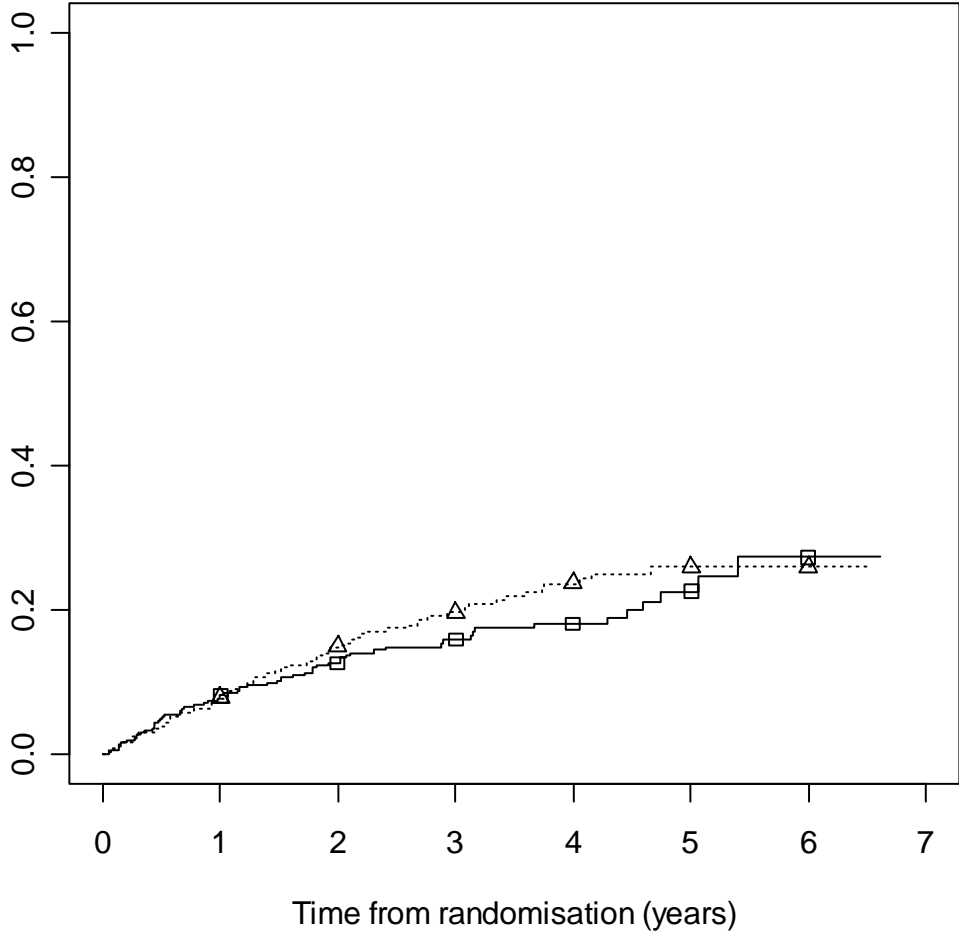

Supplement: MOESM9 [file 9622246]
